# Supplementary material for: Ab initio prediction of two-dimensional Si3C enabling high specific capacity as an anode material for Li/Na/K-ion batteries
Source: Royal Society of Chemistry journal article supplement (doi:10.1039/c9ta11589g), 2020-01-01
Supplement: c9ta11589g1.pdf [file c9ta11589g1.pdf]

## Supporting Information

### Ab initio prediction of two-dimensional Si<sub>3</sub>C enabling high specific capacity as anode material in Li/Na/K-ion batteries

Yanning Wang<sup>1</sup>, Yinshi Li<sup>1,\*</sup>

<sup>1</sup>Key Laboratory of Thermo-Fluid Science and Engineering of Ministry of Education, School of Energy and Power Engineering, Xi'an Jiaotong University, Xi'an, Shaanxi 710049, China.

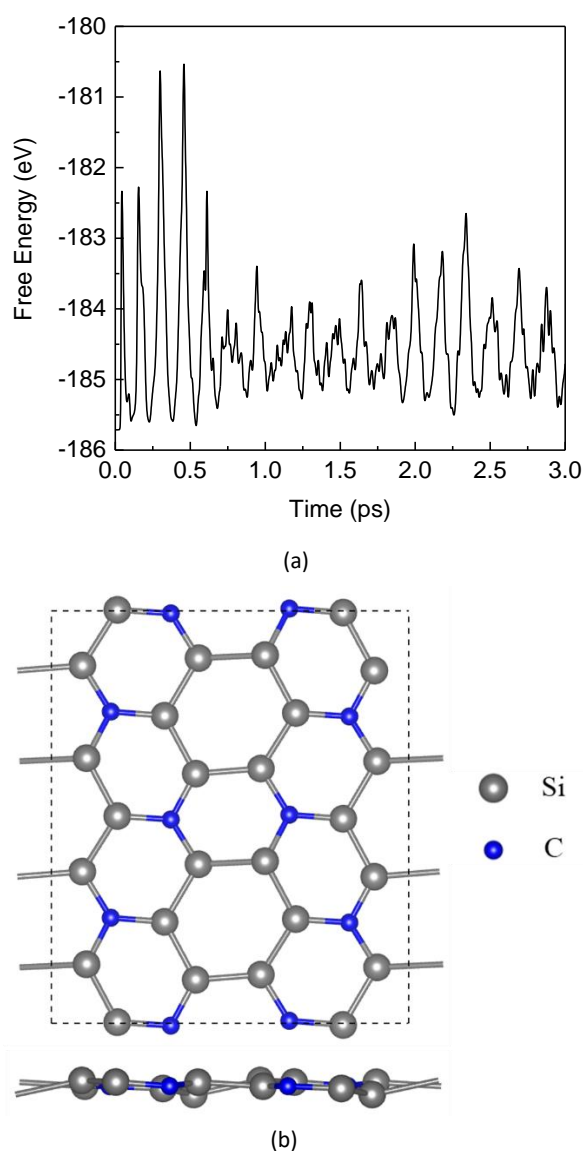

Figure S1. (a) Evolution of free energy of Si<sub>3</sub>C monolayer during the AIMD simulation. (b) Snapshot of Si<sub>3</sub>C monolayer from top and side views at 3ps.

\*Corresponding author. Email: ysli@mail.xjtu.edu.cn

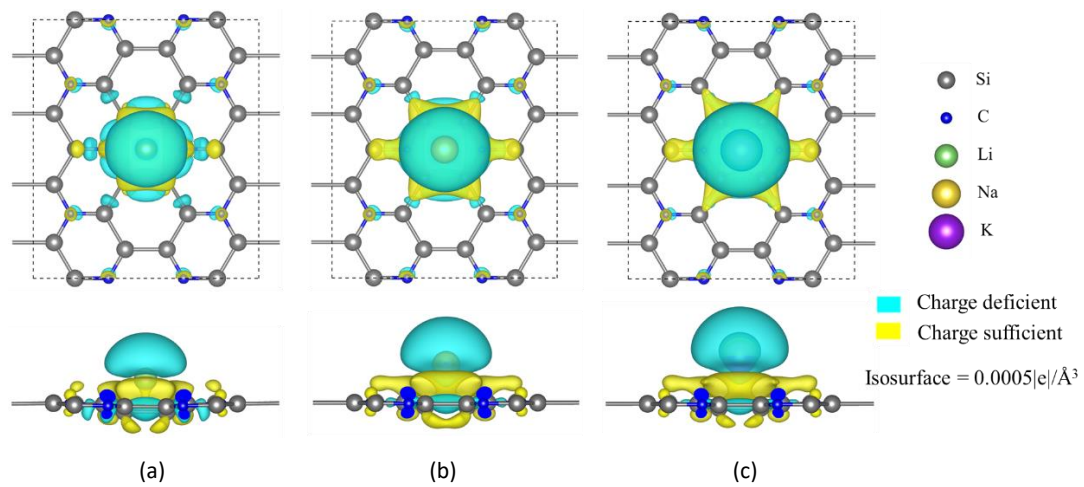

Figure S2. Optimized structures and charge difference plots of (a) Li, (b) Na and (c) K atoms adsorbed on H<sub>2</sub> site of Si<sub>3</sub>C monolayer. The blue and yellow areas represent the charge deficient area and sufficient area, respectively.

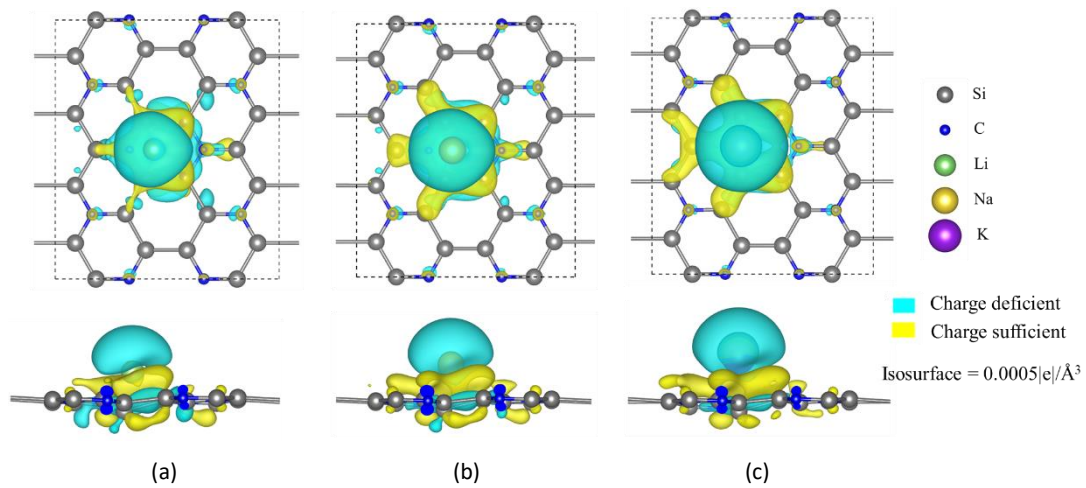

Figure S3. Optimized structures and charge difference plots of (a) Li, (b) Na and (c) K atoms adsorbed on  $T_1$ ,  $T_2$  and  $B_2$  sites of  $Si_3C$  monolayer. The blue and yellow areas represent the charge deficient area and sufficient area, respectively.

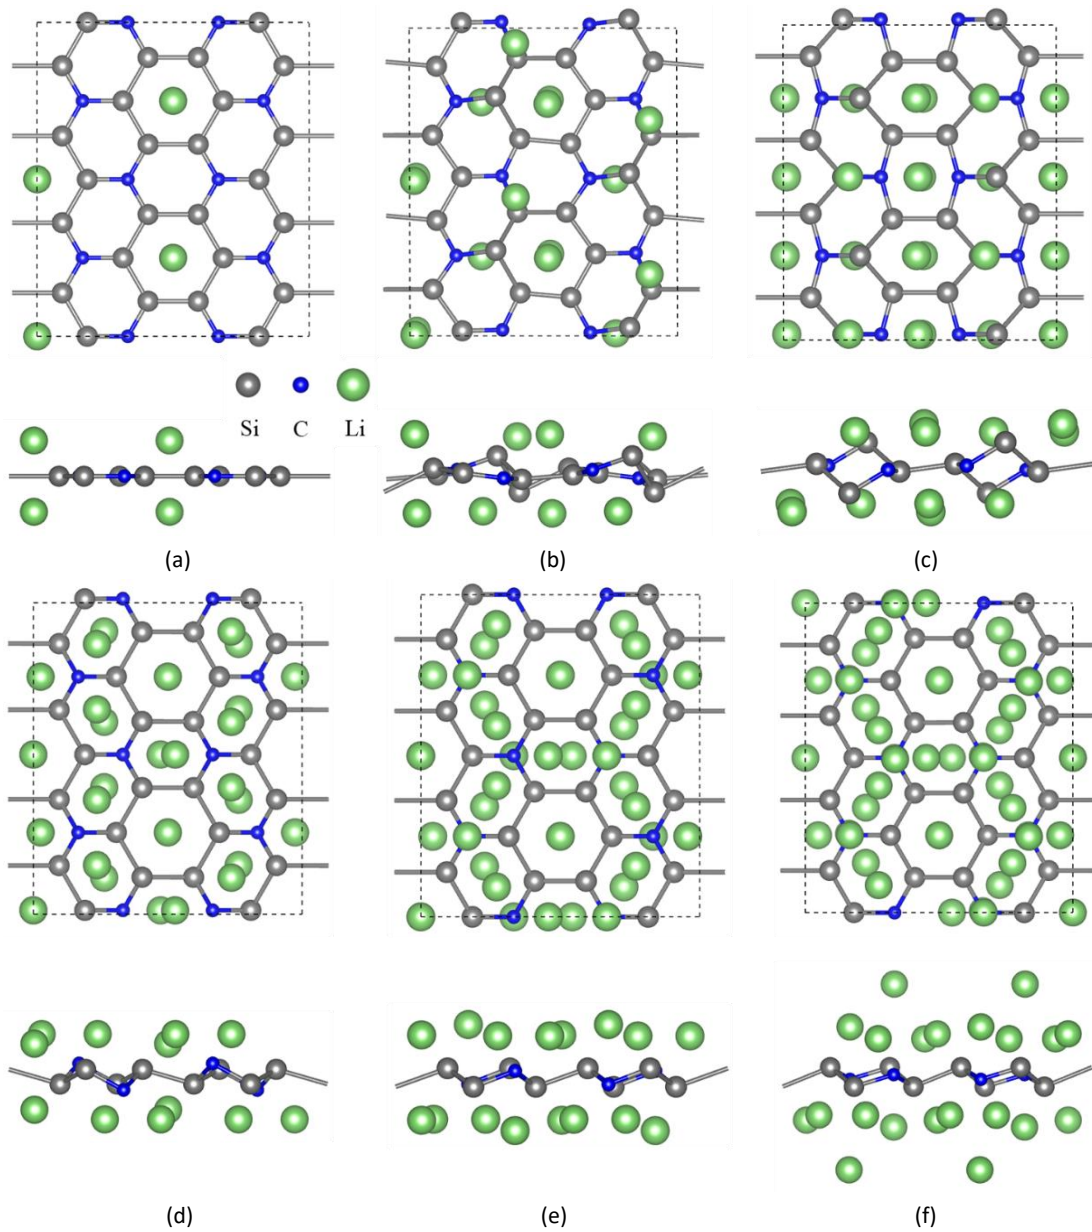

Fig. S4. Top and side views of the optimized structures for different Li concentrations. (a)  $\text{LiSi}_3\text{C}$ . (b)  $\text{Li}_2\text{Si}_3\text{C}$ . (c)  $\text{Li}_3\text{Si}_3\text{C}$ . (d)  $\text{Li}_4\text{Si}_3\text{C}$ . (e)  $\text{Li}_5\text{Si}_3\text{C}$ . (f)  $\text{Li}_6\text{Si}_3\text{C}$ .

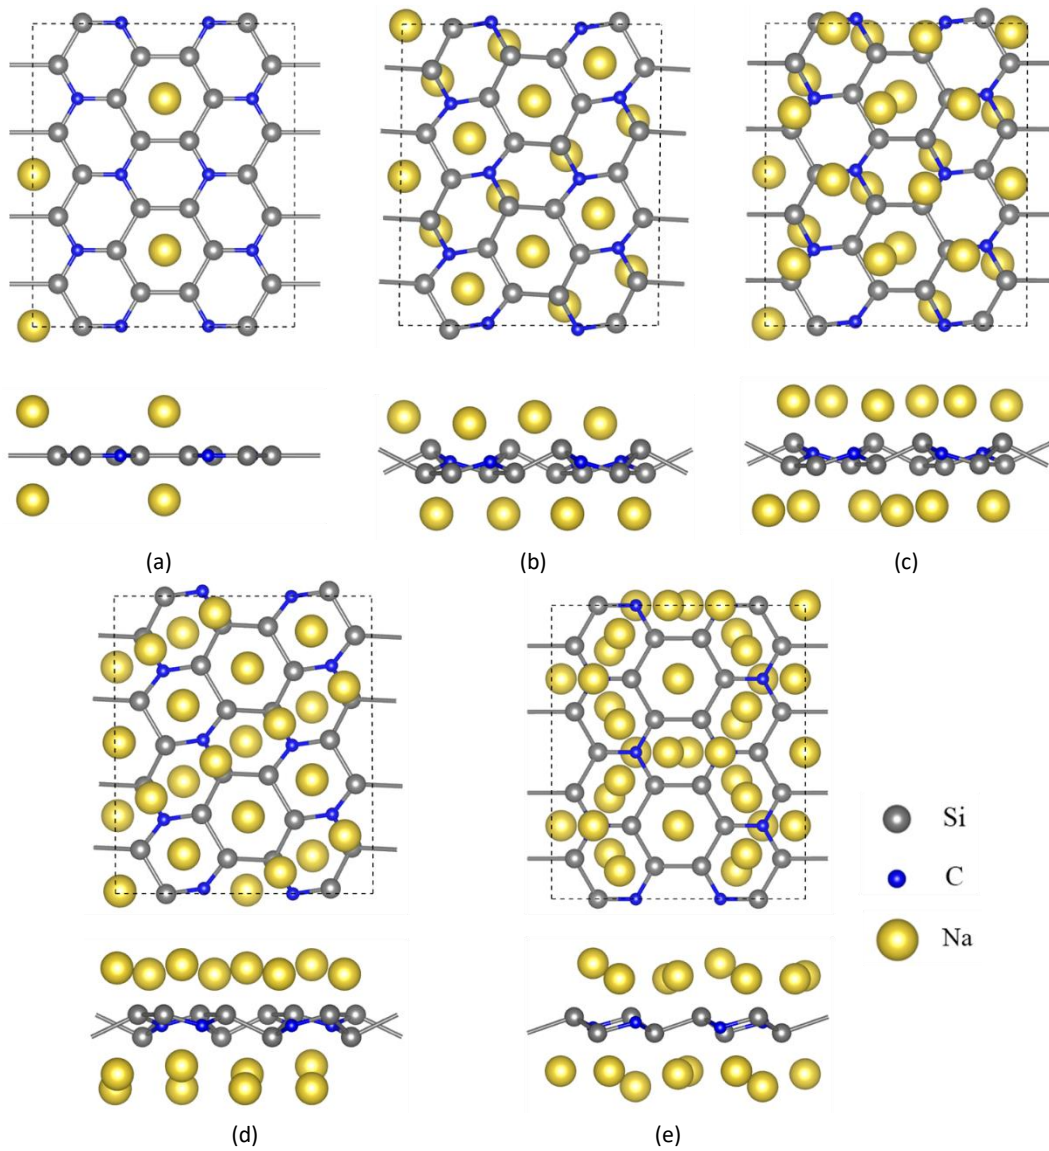

Fig. S5. Top and side views of the optimized structures for different Na concentrations. (a)  $\text{NaSi}_3\text{C}$ . (b)  $\text{Na}_2\text{Si}_3\text{C}$ . (c)  $\text{Na}_3\text{Si}_3\text{C}$ . (d)  $\text{Na}_4\text{Si}_3\text{C}$ . (e)  $\text{Na}_5\text{Si}_3\text{C}$ .

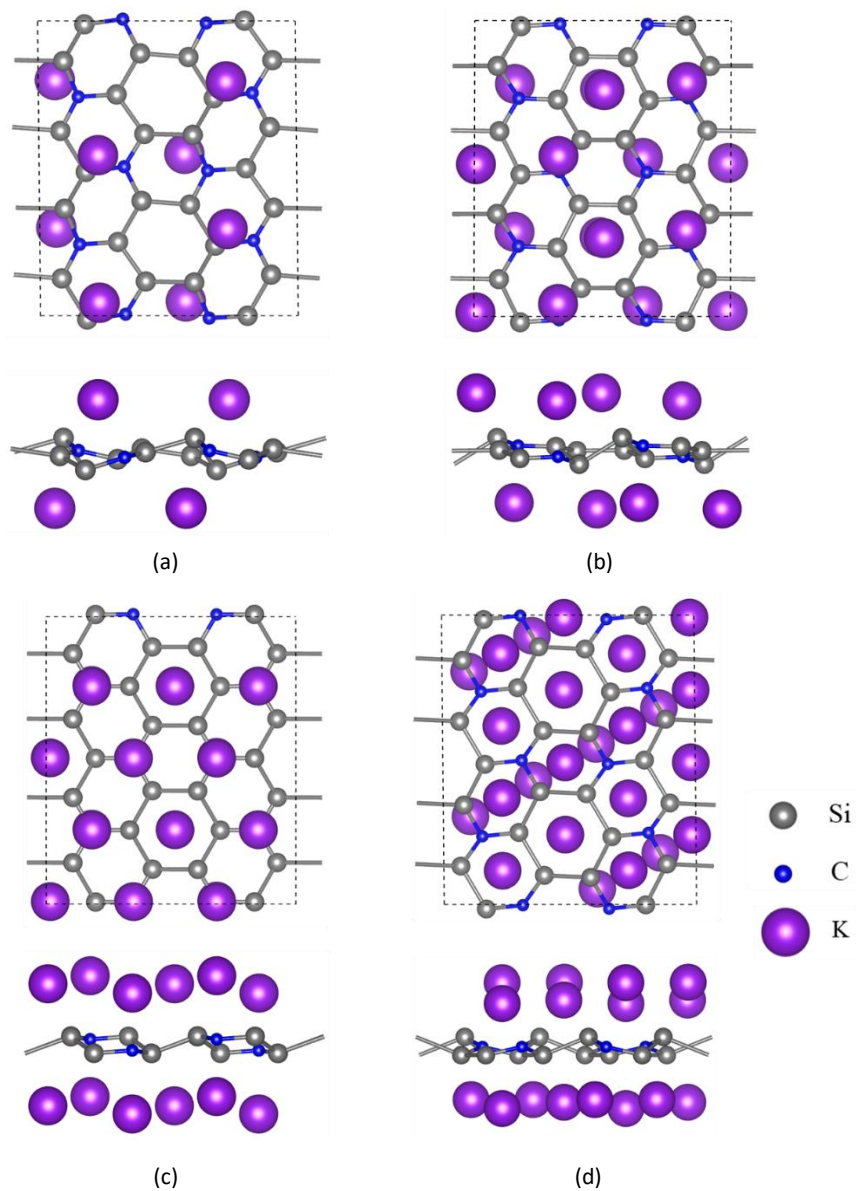

Fig. S6. Top and side views of the optimized structures for different K concentrations. (a)  $\text{KSi}_3\text{C}$ . (b)  $\text{K}_2\text{Si}_3\text{C}$ . (c)  $\text{K}_3\text{Si}_3\text{C}$ . (d)  $\text{K}_4\text{Si}_3\text{C}$ .

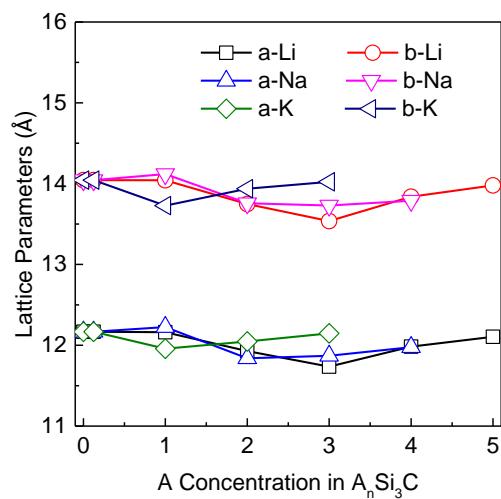

Fig. S7. Variation of lattice parameters of Si<sub>3</sub>C monolayer for different Li/Na/K concentrations.
